# Supplementary material for: Impact of the bromination of carbazole-based D-π-A organic dyes on their optical and electrochemical properties and visible-light-driven hydrogen evolution.
Source: Royal Society of Chemistry journal article supplement (doi:10.1039/d3ra02785f), 2023-06-29
Supplement: d3ra02785f1.pdf [file d3ra02785f1.pdf]

Supporting Information for

# “Impact of bromination of carbazole-based D- $\pi$ -A organic dyes on their photoelectrochemical properties and visible light-driven hydrogen evolution”

Zhangli Hu,<sup>a</sup> Jiamin Kuang,<sup>a</sup> Wenmo Fu,<sup>a</sup> Longxin Hu,<sup>a</sup> Hua Lai,<sup>\*a,b</sup> Huanian Zhang<sup>c</sup> and Xing Liu<sup>\*a,b</sup>

<sup>a</sup>College of Chemistry Materials, Hengyang Normal University, Hengyang, 421008, China.

<sup>b</sup>Hunan Provincial Key Laboratory of Functional Metal-Organic Compounds, Hengyang, 421008, China.

<sup>c</sup>College of Chemistry, Xiangtan University, Xiangtan, 411105, China.

## 1. Influence of bromination on the chemical shift of -N-CH<sub>2</sub>-

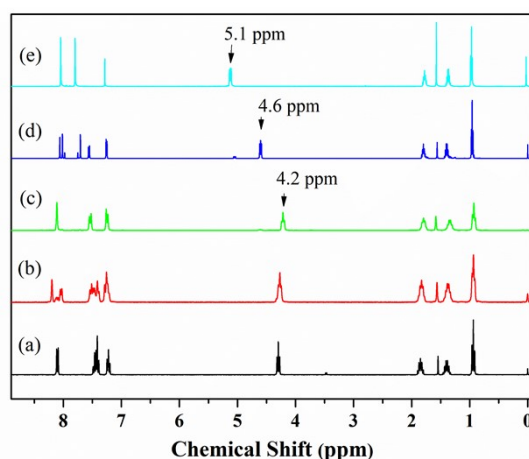

Fig.S1 <sup>1</sup>H NMR spectra of (a) *N*-butylcarbazole; (b) 3-Br-*N*-butylcarbazole; (c) 3,6-di-Br-*N*-butylcarbazole; (d) 1,3,6-tri-Br-*N*-butylcarbazole; (e) 1,3,6,8-tetra-Br-*N*-butylcarbazole)

## 2. <sup>1</sup>H NMR and MALDI-TOF MS spectra

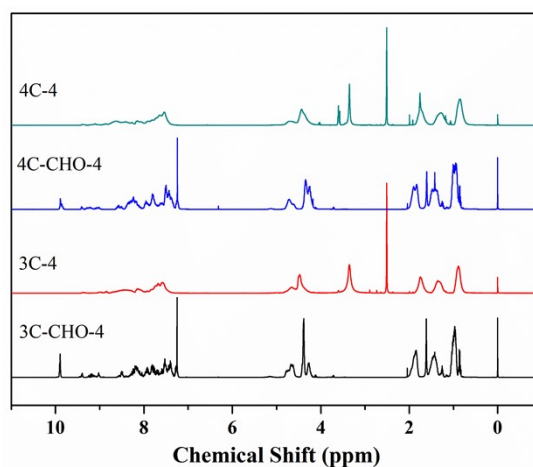

Fig.S2 <sup>1</sup>H NMR spectra of 3C-CHO-4, 3C-4, 4C-CHO-4 and 4C-4

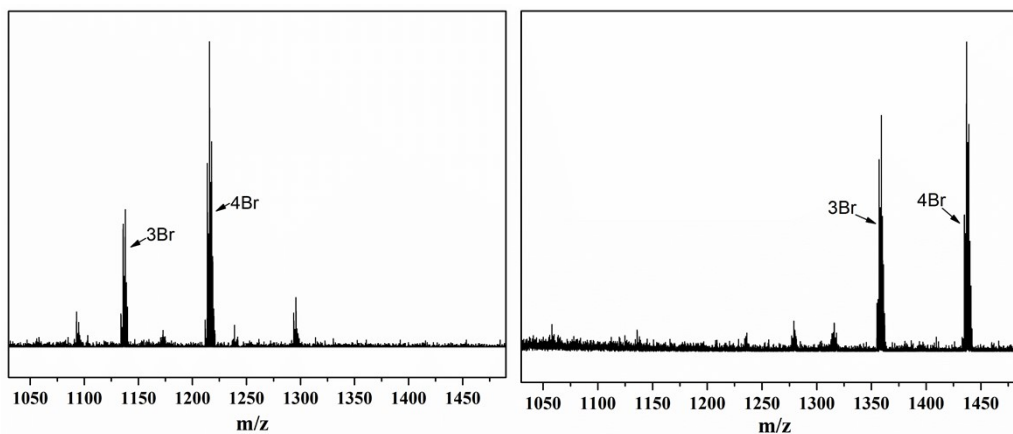

Fig.S3 MALDI-TOF MS spectra of 3C-4 (left) and 4C-4 (right)

### 3.Theoretical calculation

#### 3.1 Dihedral angles

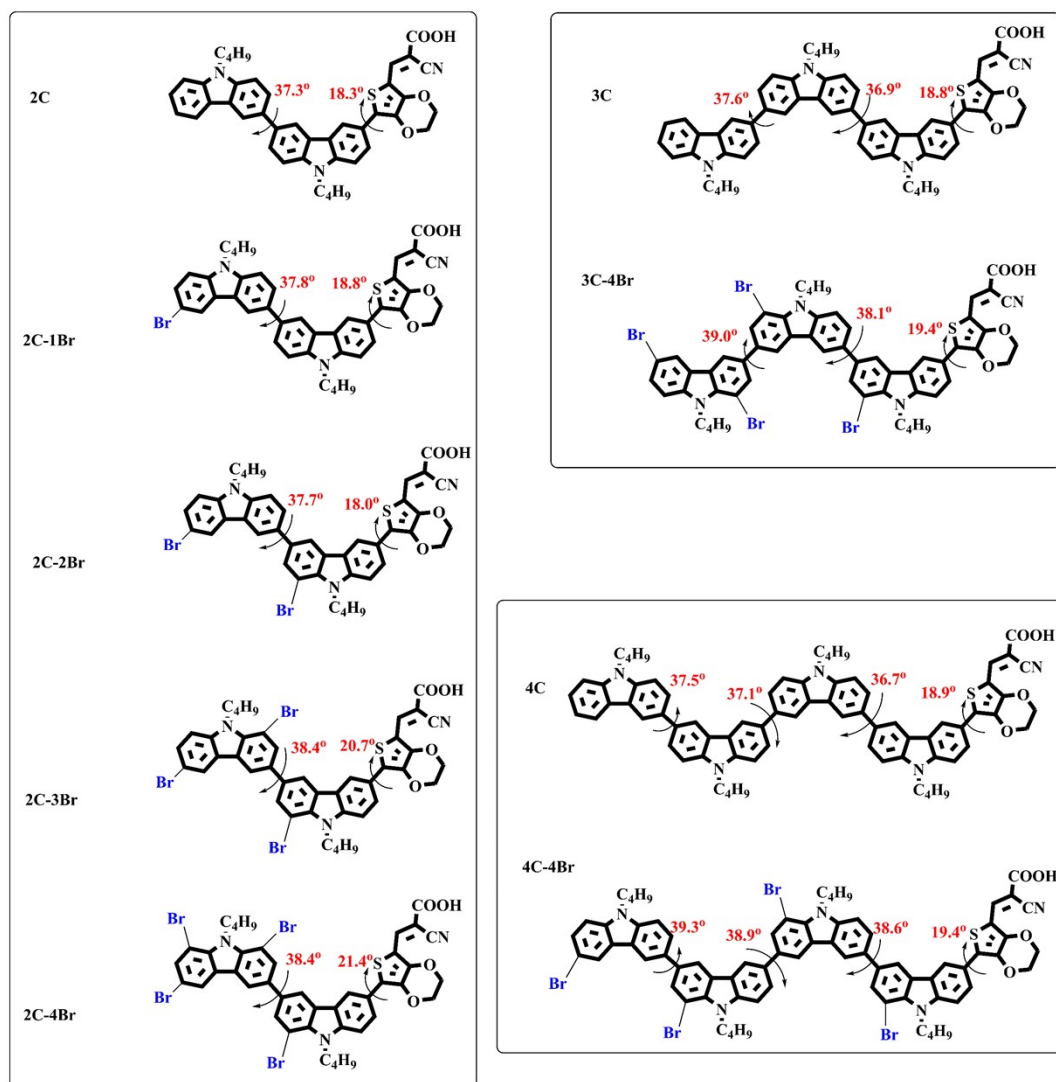

Fig.S4 Dihedral angles between heteroaromatic cycles in brominated dyes

### 3.2 HOMO and LUMO levels

Table S1 Calculated HOMO and LUMO levels of dyes

| Dye    | HOMO (eV) | LUMO (eV) | $E_{0-0}$ (eV) |
|--------|-----------|-----------|----------------|
| 2C     | -2.42     | -5.00     | 2.58           |
| 2C-1Br | -2.46     | -5.12     | 2.67           |
| 2C-2Br | -2.53     | -5.23     | 2.70           |
| 2C-3Br | -2.54     | -5.34     | 2.80           |
| 2C-4Br | -2.57     | -5.42     | 2.85           |
| 3C     | -2.41     | -4.82     | 2.41           |
| 3C-4Br | -2.53     | -5.18     | 2.64           |
| 4C     | -2.41     | -4.74     | 2.32           |
| 4C-4Br | -2.53     | -5.03     | 2.50           |

### 4. Transient photocurrent responses

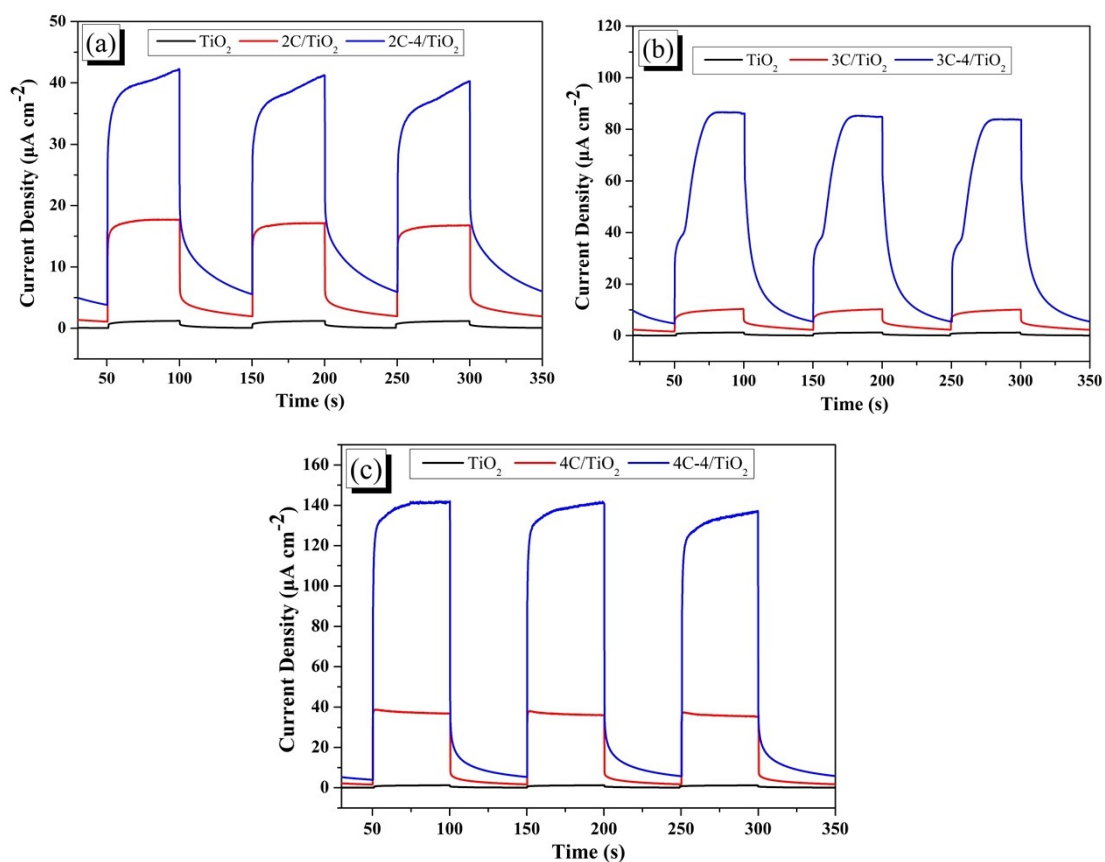

Fig.S5 Transient photocurrent densities of  $\text{TiO}_2$  and dye-sensitized  $\text{TiO}_2$  in 0.1 M  $\text{Na}_2\text{SO}_4$  TEOA solution under visible light irradiation.

## 5. Apparent quantum yields (AQY) \*

Table S2 Calculated AQY of 3C-4 under monochromatic light irradiation

| Wavelength<br>(nm) | Light intensity<br>(mW/cm <sup>2</sup> ) | Amount of H <sub>2</sub><br>( $\mu$ mol) | AQY  |
|--------------------|------------------------------------------|------------------------------------------|------|
| 450                | 37                                       | 3.96                                     | 2.58 |
| 475                | 82                                       | 2.55                                     | 2.67 |
| 500                | 59                                       | 2.62                                     | 2.70 |

\*AQY data were calculated according to the method from the literature (*J. Mater. Chem. C*, 2020,8, 14864-14872)
